# Supplementary material for: A convolutional neural network STIFMap reveals associations between stromal stiffness and EMT in breast cancer
Source: Springer Nature journal article supplement (doi:10.1038/s41467-023-39085-1), 2023-06-15
Supplement: 41467_2023_39085_MOESM1_ESM.pdf [file 41467_2023_39085_MOESM1_ESM.pdf]

**A convolutional neural network STIFMap reveals associations between stromal stiffness and EMT in breast cancer**

**Connor Stashko<sup>1,2</sup>, Mary-Kate Hayward<sup>1,2,\*</sup>, Jason J. Northey<sup>1,2,\*</sup>, Neil Pearson, Alastair J. Ironside<sup>3</sup>, Johnathon N. Lakins<sup>1,2</sup>, Roger Oria<sup>1,2</sup>, Marie-Anne Goyette<sup>4</sup>, Lakyn Mayo<sup>5</sup>, Hege G. Russnes<sup>6,7</sup>, E. Shelley Hwang<sup>8</sup>, Matthew L. Kutys<sup>5,9</sup>, Kornelia Polyak<sup>4</sup>, Valerie M. Weaver<sup>1,2,9,10,\*\*</sup>**

<sup>1</sup>Department of Surgery, University of California, San Francisco, California, USA.

<sup>2</sup>Center for Bioengineering and Tissue Regeneration, University of California, San Francisco, San Francisco, CA, USA.

<sup>3</sup>Department of Pathology, Western General Hospital, NHS Lothian, Edinburgh, UK.

<sup>4</sup>Department of Medical Oncology, Dana-Farber Cancer Institute, Boston, MA, USA.

<sup>5</sup>Department of Cell and Tissue Biology, School of Dentistry, University of California, San Francisco, San Francisco, CA, USA.

<sup>6</sup>Department of Pathology and Department of Cancer Genetics, Institute for Cancer Research, Oslo University Hospital, Oslo, Norway.

<sup>7</sup>Institute for Clinical Medicine, University of Oslo, Oslo, Norway.

<sup>8</sup>Department of Surgery, Duke University Medical Center, Durham, NC, USA.

<sup>9</sup>UCSF Helen Diller Comprehensive Cancer Center, University of California, San Francisco, San Francisco, CA, USA.

<sup>10</sup>Department of Radiation Oncology, Eli and Edythe Broad Center of Regeneration Medicine and Stem Cell Research, University of California, San Francisco, San Francisco, CA, USA.

\* These authors contributed equally to this work

\*\*

**Corresponding Author:**

Valerie M. Weaver

Email: [valerie.weaver@ucsf.edu](mailto:valerie.weaver@ucsf.edu)

## SUPPLEMENTARY INFORMATION

| ITEM NO. | SW-File Name (File Name)   | DESCRIPTION                                    | PROCESS    | SUPPLIER | PART NUMBER | QTY. | Package Qty | Unit Price (\$) | Order Qty | Extended Price (\$) |
|----------|----------------------------|------------------------------------------------|------------|----------|-------------|------|-------------|-----------------|-----------|---------------------|
| 1        | Microscope Stage_base      | AFM Stage Base                                 | INCLUDED   |          |             | 1    |             |                 |           |                     |
| 2        | Microscope Stage_X         | AFM Stage X Translation                        | INCLUDED   |          |             | 1    |             |                 |           |                     |
| 3        | Microscope Stage_Y         | AFM Stage Y Translation                        | INCLUDED   |          |             | 1    |             |                 |           |                     |
| 4        | Microscope Stage_X_knob    | AFM X Knob                                     | INCLUDED   |          |             | 1    |             |                 |           |                     |
| 5        | Microscope Stage_Y_knob    | AFM Y Knob                                     | INCLUDED   |          |             | 1    |             |                 |           |                     |
| 6        | clamp_screw_91290A19 0     | Screws frame_main into frame_clamp             | PURCHASED  | MCMaster | 91290A190   | 4    | 10          | 7.11            | 1         | 7.11                |
| 7        | clamp_nut_90576A103        | Screws frame_main into frame_clamp             | PURCHASED  | MCMaster | 90576A103   | 4    | 100         | 4.27            | 1         | 4.27                |
| 8        | clamp_washer_93475A2 30    | Screws frame_main into frame_clamp             | PURCHASED  | MCMaster | 93475A230   | 4    | 100         | 1.86            | 1         | 1.86                |
| 9        | X_frame_main               | Stage Frame_x                                  | 3D PRINTED |          |             | 1    |             |                 |           |                     |
| 10       | NEMA 17                    | Motor                                          | INCLUDED   |          | NEMA 17     | 2    |             |                 |           |                     |
| 11       | motor_faceplate            | Motor Bracket                                  | 3D PRINTED |          |             | 2    |             |                 |           |                     |
| 12       | slider                     | Motor Frame                                    | 3D PRINTED |          |             | 2    |             |                 |           |                     |
| 13       | wedge_1                    | Bracket Adjuster_front                         | 3D PRINTED |          |             | 2    |             |                 |           |                     |
| 14       | wedge_2                    | Bracket Adjuster_back                          | 3D PRINTED |          |             | 2    |             |                 |           |                     |
| 15       | wedge_spring_5108N27 1     | Springs holding Motor Bracket with Motor Frame | PURCHASED  | MCMaster | 9044K113    | 4    | 3           | 5.26            | 2         | 10.52               |
| 16       | wedge_pin_m3x36_9159 5A140 | Tensioning Pin                                 | PURCHASED  | MCMaster | 91595A140   | 4    | 25          | 9.91            | 1         | 9.91                |
| 17       | wedge_screw_92000A0 77     | Bracket Adjusting Screws                       | PURCHASED  | MCMaster | 92000A077   | 4    | 50          | 9.94            | 1         | 9.94                |
| 18       | wedge_nut_90591A250        | Used with Bracket Adjusting Screws             | PURCHASED  | MCMaster | 90591A250   | 4    | 100         | 2.33            | 1         | 2.33                |
| 19       | wedge_washer_97310A 111_   | Used with Bracket Adjusting Screws             | PURCHASED  | MCMaster | 97310A111   | 4    | 100         | 2.86            | 1         | 2.86                |
| 20       | slider_pin_91585A389       | Alignment Rod                                  | PURCHASED  | MCMaster | 91585A389   | 4    | 1           | 4.14            | 4         | 16.56               |
| 21       | motor_screw_91290A111      | Screws Motor into Motor Bracket                | PURCHASED  | MCMaster | 91290A111   | 4    | 100         | 8.71            | 1         | 8.71                |
| 22       | X_frame_clamp              | Clamps Stage Frame_x onto AFM Stage            | 3D PRINTED |          |             | 1    |             |                 |           |                     |
| 23       | knob_cap                   | Knob Adapter                                   | 3D PRINTED |          |             | 2    |             |                 |           |                     |
| 24       | knob_screw_90044A247       | Adapter Screw                                  | PURCHASED  | MCMaster | 90044A247   | 2    | 5           | 7.44            | 1         | 7.44                |
| 25       | 5mm_hub_9889T106           | Motor Coupling                                 | PURCHASED  | MCMaster | 9889T106    | 2    | 1           | 16.08           | 2         | 32.16               |
| 26       | 8mm_Hub_9889T109           | Motor Coupling                                 | PURCHASED  | MCMaster | 9889T109    | 2    | 1           | 16.08           | 2         | 32.16               |
| 27       | Acetal_disk_59985K620      | Motor Coupling                                 | PURCHASED  | MCMaster | 59985K62    | 2    | 1           | 3.22            | 2         | 6.44                |
| 28       | rubber pad_X               | Between X_frame_main and X_frame_clamp         | INCLUDED   |          |             | 1    |             |                 |           |                     |
| 29       | Yframe_main                | Stage Frame_y                                  | 3D PRINTED |          |             | 1    |             |                 |           |                     |
| 30       | Yframe_clamp               | Clamps Stage Frame_y onto AFM Stage            | 3D PRINTED |          |             | 1    |             |                 |           |                     |
| 31       | rubber pad_Y               | Between Y_frame_main and Y_frame_clamp         | INCLUDED   |          |             | 1    |             |                 |           |                     |
| 32       | rollers                    | Rollers screw into Y_frame_main                | PURCHASED  | MCMaster | 3659K11     | 2    | 1           | 36.88           | 2         | 73.76               |
|          |                            |                                                |            |          |             |      |             |                 | TOTAL     | 226.03              |

**Supplementary Table 1. AutoAFM Bill of Materials.** List of components required to implement an AutoAFM system on an existing MFP 3D Bio AFM (Asylum Research).

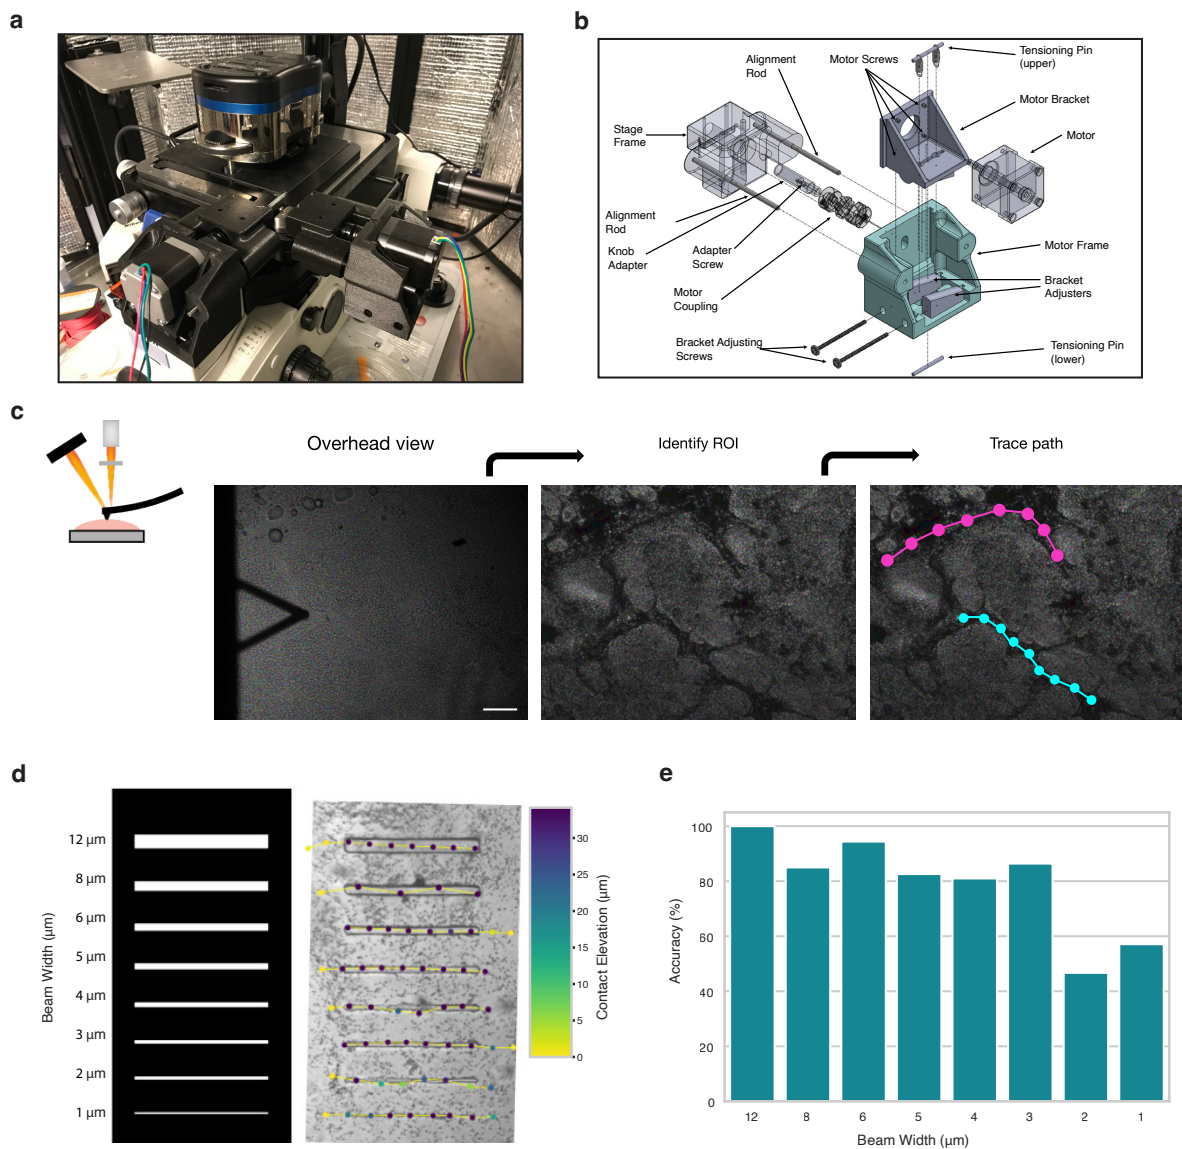

**Supplementary Figure 1. AutoAFM Principle and Validation.** **a**, Photo of AutoAFM assembly. **b**, Technical drawing of all main components of the AutoAFM system. **c**, AutoAFM workflow. The AutoAFM workflow was used for generating 200 trace paths. **d**, Overview of PDMS balance beam design (left) and actual fabrication (right) with points overlaid. **e**, Accuracy of AutoAFM movements along each PDMS beam. Scale bar, 100  $\mu\text{m}$ . Source data are provided as a Source Data file.

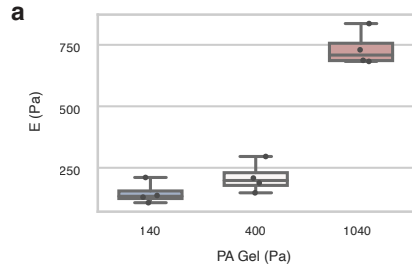

| PA Gel Nominal Stiffness (PA) | Actual Stiffness (PA) |
|-------------------------------|-----------------------|
| 140                           | 146.71                |
| 400                           | 210.19                |
| 1040                          | 733.97                |

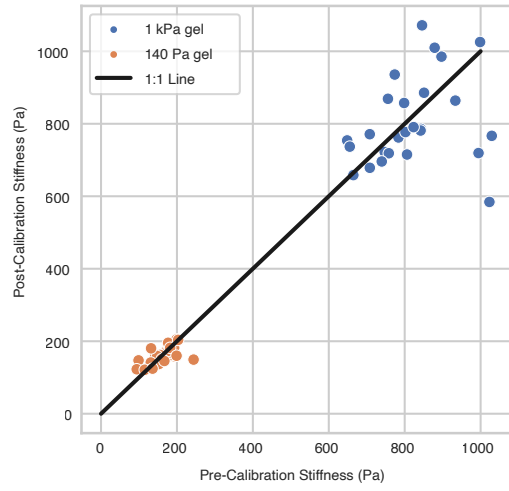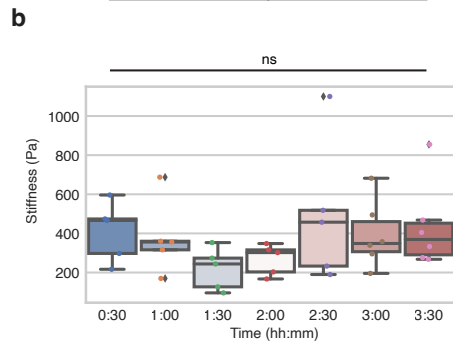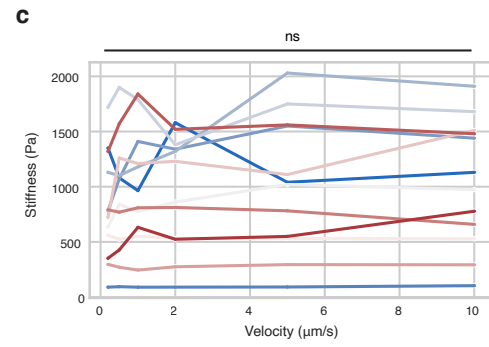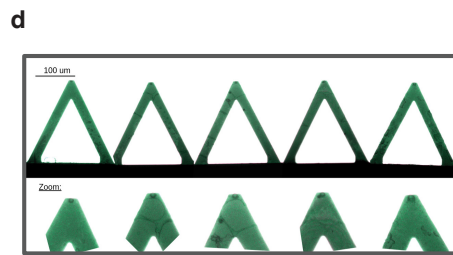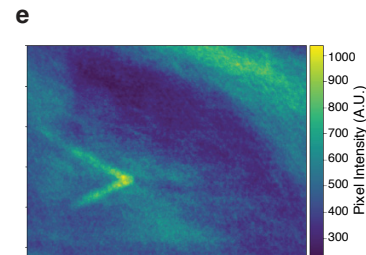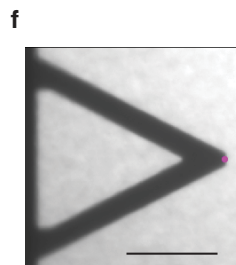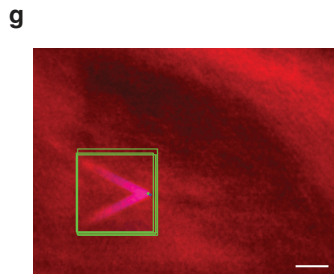

**Supplementary Figure 2. AFM Control Experiments.** **a**, Young's Moduli of polyacrylamide (PA) gels of different nominal elasticities measured using shear rheology (left).  $n = 4$  gels of each elasticity. Pre and post-sampling calibration of cantilever tip in PA gels (right). **b**, Time course of the same tissue region probed with AFM every thirty minutes for 3.5 hours ( $n = 5$  positions probed per timepoint)  $p$ -value=0.93. **c**, Elasticity of different tissue positions probed with AFM at different velocities.  $n = 12$  positions. **d**, Representative images of AFM cantilevers used. **e**, AFM cantilever artifact in the average image for an AutoAFM scan. **f**,  $5 \mu\text{m}$  ball position on the end of an AFM cantilever. **g**, AFM cantilever ball positions fit onto the AFM artifact from an average image (**e**). Boxes denote 25th to 75th percentile with median line. Whiskers mark the minima and the maxima excluding outliers. Statistical analyses used were performed using two-sided Mann-Whitney U test, ns = non-significant. Scale bar,  $100 \mu\text{m}$ . Source data are provided as a Source Data file.

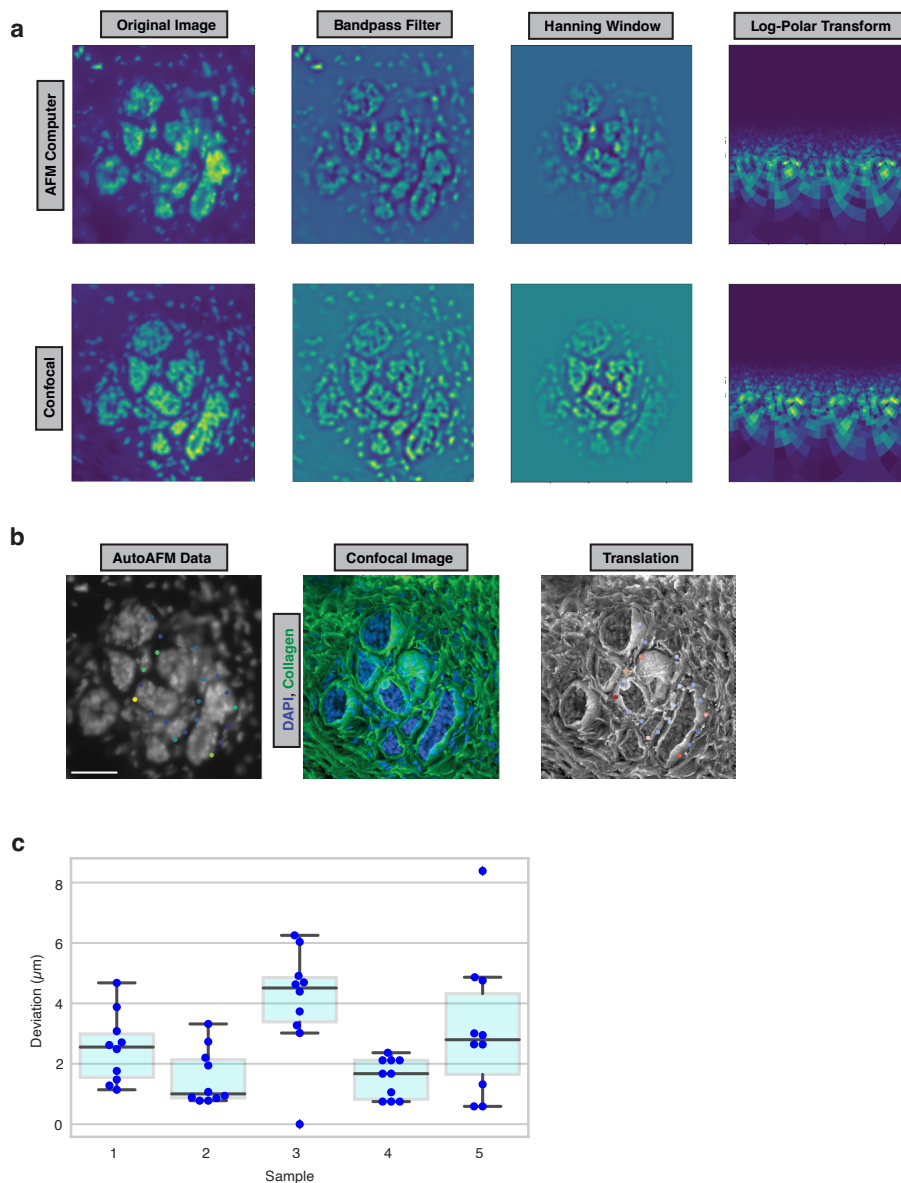

**Supplementary Figure 3. Image Stitching and Overlaying.** **a**, Pipeline for Fourier-Mellin Transformation. The confocal DAPI image was downsampled (bottom left) to better resemble the AFM image (top left). Then, both images were processed with a Bandpass Filter, Hanning Window, and Log-Polar Transformation. Translational differences between the final images were converted into scaling and rotation differences in the original images. **b**, Overall translation of AutoAFM data from a low-resolution AFM microscope image onto the high-resolution confocal image. **c**, Deviation in cell positions after transformation.  $n = 50$  cell positions from five samples. Boxes denote 25th to 75th percentile with median line. Whiskers mark the minima and the maxima excluding outliers. Scale bar,  $50 \mu\text{m}$ . Source data are provided as a Source Data file.

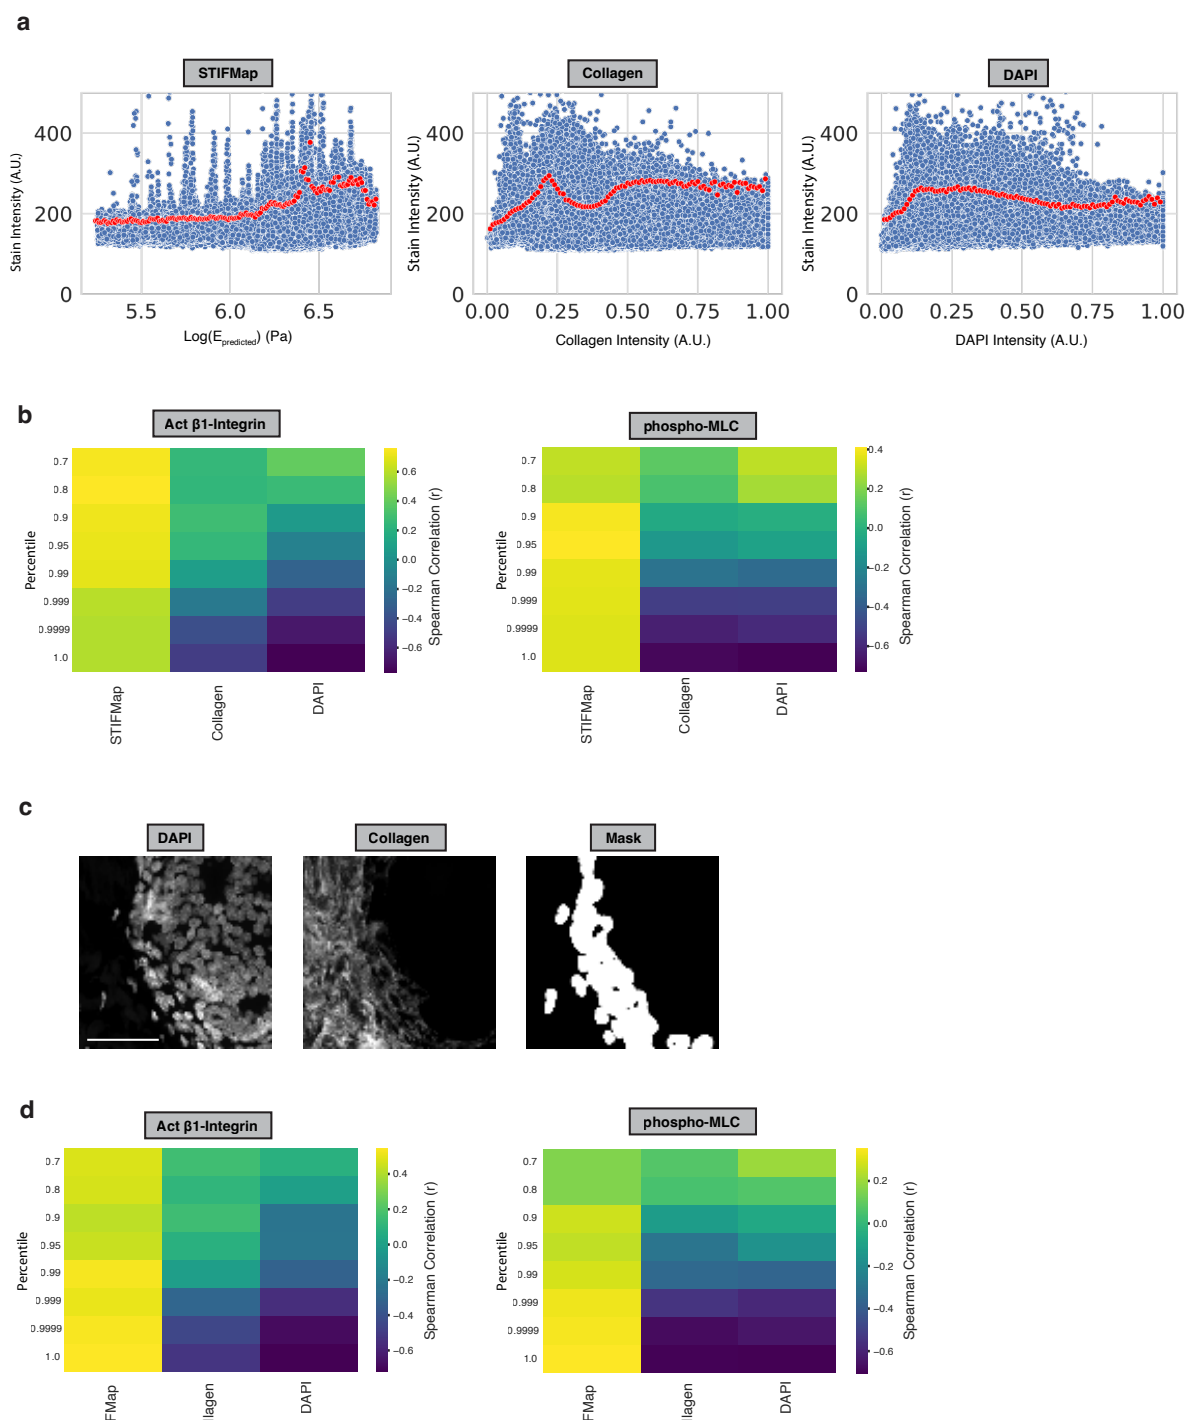

**Supplementary Figure 4. Imaging Sensitivity Analysis.** **a**, Scatterplots of stain intensity vs predicted stiffness (left), collagen intensity (middle), or DAPI intensity (right) shown for all pixels (blue) or aggregated to show the 99<sup>th</sup> percentile of stain intensity for each percentile of the indicated independent variable (red) for the representative pMLC stain shown in Fig. 3c. Aggregating data into percentiles is necessary to limit the influence of image regions where cells



are not interacting with the ECM. **b**, Sensitivity analysis of the average Spearman correlation coefficient as shown in **(a)** for stain intensity compared to DAPI, collagen, and STIFMap depending on the stain threshold used.  $n = 60$  FOVs from 10 patient tumor samples. **c**, Representative FOV indicating pixels that are at the interface between cells and collagen. **d**, Sensitivity analysis of the average Spearman correlation coefficient depending on the stain threshold used when only masked pixels are included.  $n = 60$  FOVs from 10 patient tumor samples. Scale bar, 50  $\mu\text{m}$ . Source data are provided as a Source Data file.

**a**

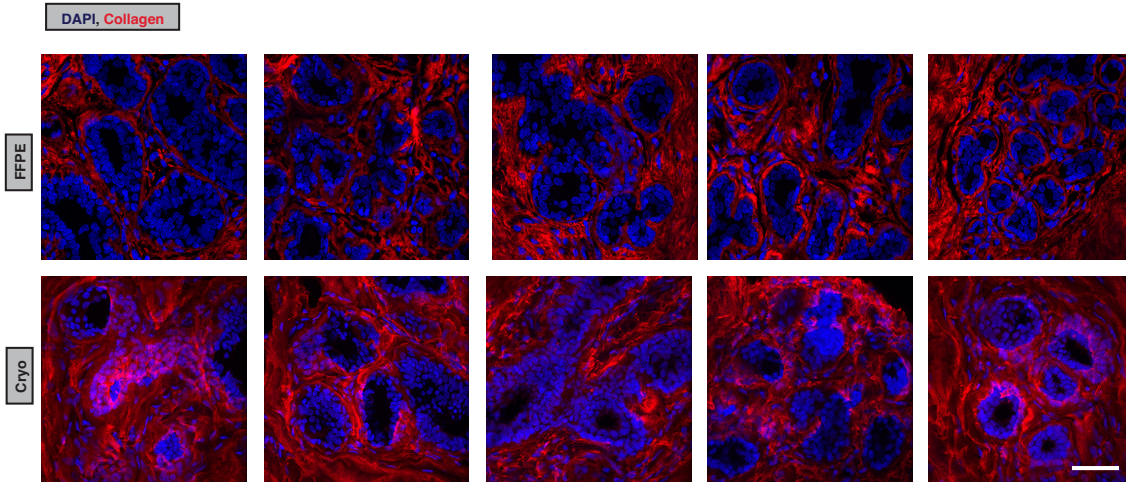

**b**

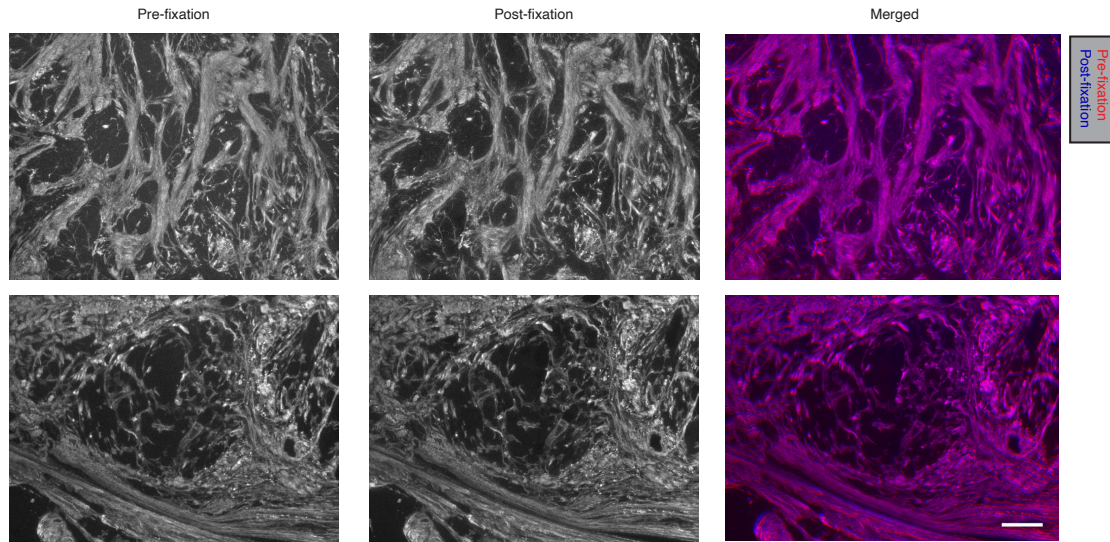

**c**

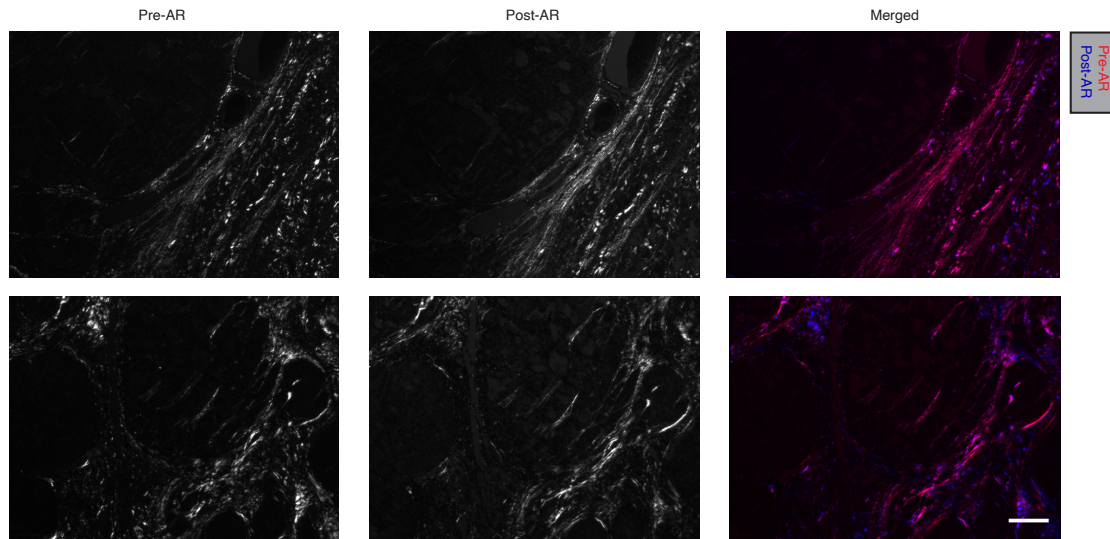

**Supplementary Figure 5. Collagen Morphology Validation in FFPE Tissue.** **a**, Five FOVs for an FFPE (top) or cryopreserved tissue (bottom) taken from the same patient stained with DAPI and CNA. Scale bar, 50 $\mu$ m. **b**, Representative images of collagen with CNA staining in cryopreserved tissues before and after 10% formalin-fixation for 1 hour. **c**, Representative images of collagen with PS red staining in FFPE tissues before and after antigen retrieval (AR). Red; pre and blue; post (b,c). Scale bar, 200  $\mu$ m. Similar results for a, b and c were observed for 3 independent samples.

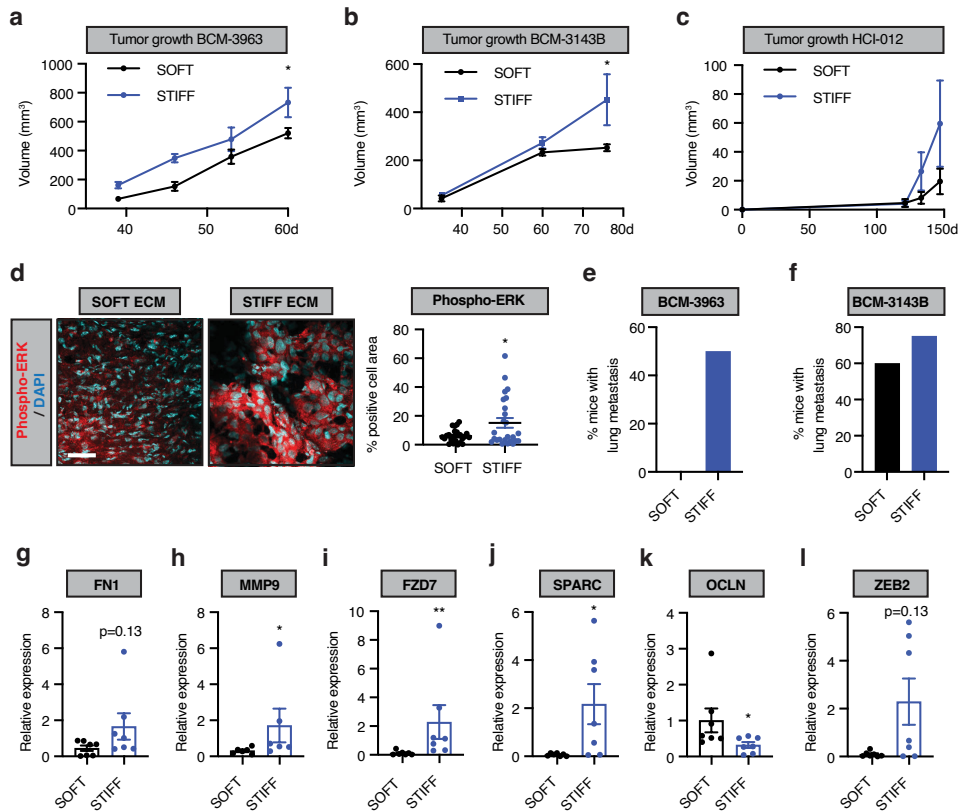

**Supplementary Figure 6. A stiff stroma enhances mechanosignaling, tumor growth, metastasis, and mesenchymal gene expression in HER2-positive breast cancer PDXs.** a-c, Graphs showing average tumor growth in SOFT and STIFF matrices for the HER2-positive PDX models indicated as determined by caliper measurement. SOFT and STIFF, n = 10 each for BCM-3963 and BCM-3143B, n = 4 each for HCI-012. p(SOFT vs STIFF; BCM-3963) = 0.0401. p(SOFT vs STIFF; BCM-3143B) = 0.0148. **d**, Representative images of immunofluorescence staining of phospho-ERK in SOFT and STIFF HER2-positive PDX tumors (left). Scale bar, 50  $\mu$ m. Quantification of average phospho-ERK positive cell area for all HER2-positive PDX tumors (right). SOFT; n = 6, STIFF; n = 6. **e,f**, Percentage of mice bearing HER2-positive PDX tumors with SOFT and STIFF matrices presenting detectable lung metastases. SOFT and STIFF, n = 10 each for BCM-3963 and BCM-3143B. **g-l**, Graphs showing RT-PCR analysis of RNA extracted from HER2-positive PDX tumors with SOFT and STIFF matrices showing relative gene expression for the indicated mesenchymal and epithelial genes. SOFT; n = 7, STIFF; n = 7. p(SOFT vs STIFF; MMP9) = 0.0411. p(SOFT vs STIFF; FZD7) = 0.0023. p(SOFT vs STIFF; SPARC) = 0.0379. All graphs are presented as mean  $\pm$  S.E.M. Statistical tests used were two-sided Mann-

Whitney U test (**g-l**), two-sided unpaired *t*-test (**d**) and two-way ANOVA (with Bonferroni's multiple comparisons test) (**a-c**). \* $P < 0.03$ , \*\* $P < 0.002$ , \*\*\* $P < 0.0002$ , ns=non-significant. Source data are provided as a Source Data file.

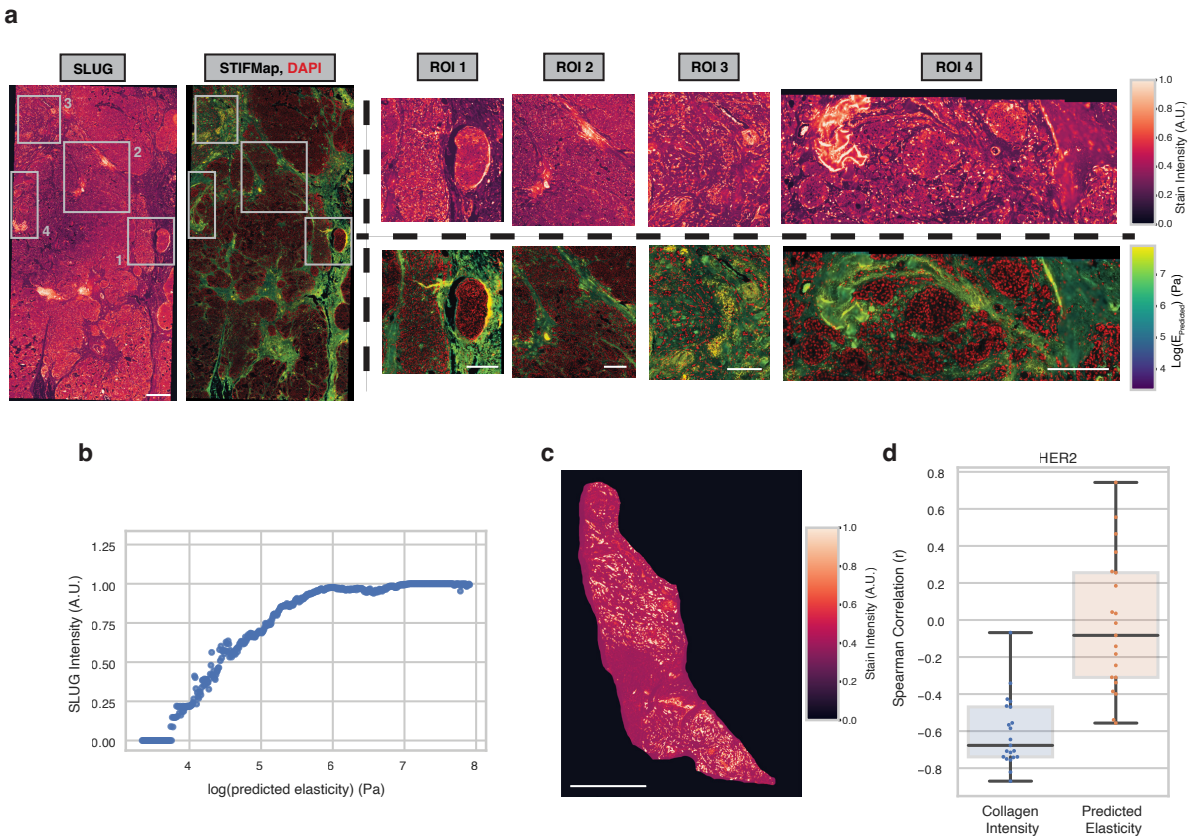

**Supplementary Figure 7. Additional Patient EMT Staining Data.** **a**, Representative WSI and ROIs for immunofluorescence staining of SLUG in a TNBC sample. 6 patient tumor samples were imaged. Scale bar (WSI), 100  $\mu\text{m}$ . Scale bar (ROIs), 50  $\mu\text{m}$ . **b**, Quantification of the 99th percentile of SLUG staining intensity for each percentile of predicted matrix elasticity for the image shown in **(a)**. **c**, Representative HER2 stain from HER2+ breast cancer cohort (21 patient samples total). Scale bar, 1 mm. **d**, Correlation between HER2 intensity and either collagen intensity or predicted stiffness in the HER2+ cohort.  $n = 21$  patient tumor samples. Boxes denote 25th to 75th percentile with median line. Whiskers mark the minima and the maxima excluding outliers. Source data are provided as a Source Data file.
